## Beneficial effects of dexmedetomidine on ischaemic myocardium of anaesthetized dogs†

P. M. H. J. ROEKAERTS, F. W. PRINZEN AND S. DE LANGE

### Summary

We have studied the effect of dexmedetomidine during coronary artery stenosis (CAS) in dogs. Three periods of 15 min of CAS were induced at 40-min intervals in two groups of dogs (dexmedetomidine compared with placebo). Dexmedetomidine was administered before the second and third periods of CAS in doses of 1 and 3  $\mu\text{g kg}^{-1}$ , respectively. Dexmedetomidine decreased plasma concentrations of noradrenaline by mean 71 (SEM 9) %, heart rate by 8 (4) %, cardiac output by 30 (6) % and increased mean arterial pressure by 23 (10) %. Dexmedetomidine reduced blood flow in non-ischaemic myocardium and in the ischaemic epicardial layer by 16 (8) %, but blood flow was preserved in the ischaemic mid-myocardial and subendocardial layers. Consequently, dexmedetomidine increased the ischaemic–non-ischaemic blood flow ratio. Dexmedetomidine did not change myocardial oxygen demand from 4.91 (0.33) to 3.76 (0.25)  $\mu\text{mol min}^{-1} \text{g}^{-1}$ , thereby reducing the oxygen deficiency of the ischaemic myocardium from 1.47 (0.37) to 0.29 (0.32)  $\mu\text{mol min}^{-1} \text{g}^{-1}$ . (*Br. J. Anaesth.* 1996;77:427–429)

### Key words

Sympathetic nervous system, adrenergic agonists. Heart, myocardial function. Sympathetic nervous system, dexmedetomidine. Heart, ischaemia. Heart, blood flow, myocardial. Dog.

Preliminary studies suggest that perioperative use of dexmedetomidine may result in a decreased risk of adverse cardiac events, including myocardial ischaemia<sup>1</sup>. This probably depends on a centrally mediated sympatholytic effect which decreases catecholamine-mediated stress responses. In contrast with these beneficial central effects,  $\alpha_2$  agonists may also cause peripheral and coronary vasoconstriction by stimulation of postjunctional  $\alpha_2$  adrenergic receptors. The effect of this vasoconstriction during myocardial ischaemia is controversial. Heusch and Deussen presented evidence that  $\alpha_2$  adrenoreceptor activation can worsen ischaemia<sup>2</sup>. In contrast, other investigators reported that  $\alpha$  adrenoreceptor stimulation can beneficially modulate coronary blood flow during myocardial ischaemia by preventing transmural redistribution of blood flow away from ischaemic endocardium<sup>3</sup>.

The aim of this study was to determine if systemic dexmedetomidine has beneficial effects on ischaemic

myocardium in an animal model known to be highly sensitive to the direct, peripheral vasoconstrictor effect of  $\alpha_2$  agonists.

### Methods and results

After obtaining animal Ethics Committee approval, mongrel dogs were anaesthetized with pentobarbitone and their lungs ventilated with 1% halothane and nitrous oxide in oxygen. The dogs were instrumented, as described previously<sup>4</sup>, to measure aortic and left ventricular pressure and cardiac output. A cuff was placed on the left descending coronary artery (LAD). Coronary pressure was measured distal to the cuff. The degree of stenosis was controlled by keeping constant mean perfusion pressure distal to the stenosis using a Servo system feeding a motor pump, which determined the degree of cuff inflation. Global myocardial oxygen demand was estimated using the pressure–work index<sup>5</sup>. Regional oxygen consumption was measured from blood flow (radioactive microspheres) and local arterial–coronary venous oxygen content difference. Oxygen deficiency was calculated by subtracting oxygen consumption from oxygen demand.

Five minutes before the first period of CAS, control blood samples were obtained and haemodynamic measurements were performed. Thereafter, CAS 1 was induced by reducing mean pressure in the LAD distal to the stenosis to 40% of mean arterial pressure. After 12 min of stenosis, microspheres were injected. Two minutes later, blood samples were obtained and haemodynamic measurements performed. Thereafter, the CAS was released. Twenty minutes after release of the stenosis, measurements were repeated, followed by administration of dexmedetomidine 1  $\mu\text{g kg}^{-1}$  in the active drug group ( $n=11$ ) and saline in the placebo group ( $n=9$ ). Twenty minutes after administration of dexmedetomidine, measurements were repeated followed by a second period of stenosis. Measurements during stenosis and the subsequent recovery period were the same as during the first episode of stenosis. This procedure was repeated a third time after administration of dexmedetomidine 3  $\mu\text{g kg}^{-1}$  in the drug group.

PAUL M. H. J. ROEKAERTS, MD, SIMON DE LANGE, MB, BS, PHD, FRCA (Department of Anaesthesiology); FRITS W. PRINZEN, PHD (Department of Physiology and Anaesthesiology); University Hospital of Maastricht, PO Box 5800, 6202 AZ Maastricht, The Netherlands. Accepted for publication: April 29, 1996.

†Presented in part at the 9th Annual Meeting of the European Association of Cardiothoracic Anaesthesiologists, June 1994, Turku, Finland.

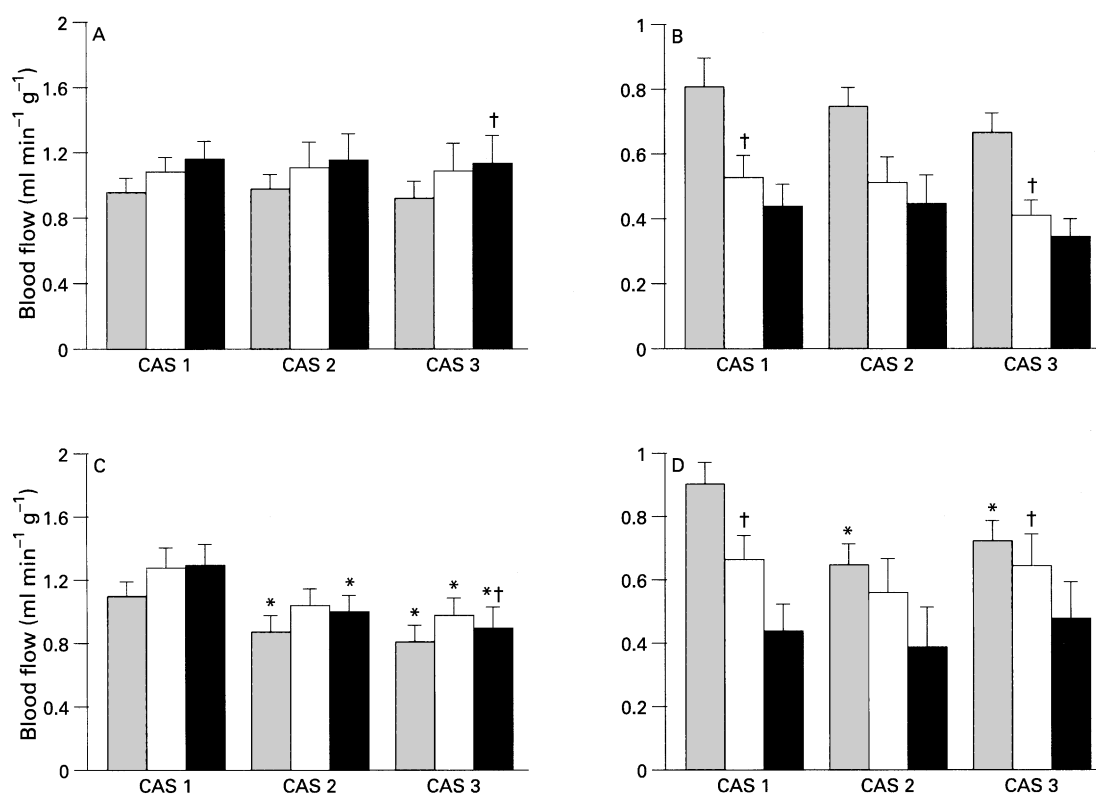

**Figure 1** Regional blood flow distribution in non-ischæmic (left, A and C) and ischæmic (right, B and D) myocardium in the placebo (upper, A and B) and drug (lower, C and D) groups, measured with radioactive microspheres. Transmural samples were obtained from the perfusion area of the LAD (ischæmic myocardium) and from the posterior wall and interventricular septum (non-ischæmic myocardium). Samples were divided into subendocardial, mid-wall and subepicardial layers. In this way, coronary blood flow was measured simultaneously in non-ischæmic and ischæmic myocardium during the three stenoses. Shaded bars = epicardial flow; open bars = mid-myocardial flow; solid bars = endocardial flow. CAS = Coronary artery stenosis. Data are mean (SEM);  $n=9$  in the placebo group,  $n=11$  in the drug group. \*Significantly different from corresponding CAS 1 value; †significantly different from corresponding value in other group.

Two-way ANOVA for repeated measures was used for inter-group comparisons. Intragroup comparisons were evaluated using one-way ANOVA for repeated measures and Fisher's protected LSD test as *post hoc* test. Baseline values between the two groups were compared using Student's *t* test.  $P<0.05$  was considered significant. Results are expressed as mean (SEM).

Dexmedetomidine decreased heart rate (from 126 (6) to 114 (5) beat min<sup>-1</sup>),  $dP/dt_{max}$  (from 1371 (128) to 1177 (62) mm Hg s<sup>-1</sup>) and cardiac output (from 4.2 (0.3) to 2.4 (0.4) litre min<sup>-1</sup>) and increased mean arterial pressure (from 81 (4) to 98 (4) mm Hg) and systemic vascular resistance (from 1572 (131) to 3902 (563) dyn s cm<sup>-5</sup>). In the placebo group, no haemodynamic changes were observed throughout the study.

Dexmedetomidine decreased plasma concentrations of noradrenaline from 121 (17) to 25 (12) pg ml<sup>-1</sup>.

After dexmedetomidine 3 µg kg<sup>-1</sup>, ischæmic-non-ischæmic blood flow ratios were significantly higher in the epicardial (from 0.81 (0.07) to 0.93 (0.09) and endocardial (from 0.33 (0.06) to 0.47 (0.10) layers compared with placebo (fig. 1).

Dexmedetomidine increased haemoglobin concentration from 7.2 (0.2) to 8.4 (0.3) mmol litre<sup>-1</sup> and decreased myocardial oxygen demand from 4.91

(0.33) to 3.76 (0.25) µmol min<sup>-1</sup> g<sup>-1</sup>. Regional myocardial oxygen consumption did not change after dexmedetomidine (from 3.08 (0.39) to 3.20 (0.51) µmol min<sup>-1</sup> g<sup>-1</sup>). Dexmedetomidine decreased myocardial oxygen deficiency from 1.47 (0.37) to 0.29 (0.32) µmol min<sup>-1</sup> g<sup>-1</sup>.

## Comment

In this study, dexmedetomidine decreased myocardial oxygen demand and reduced blood flow in non-ischæmic myocardium. This was related to its haemodynamic effects; reduction in heart rate and  $dP/dt_{max}$ . Blood flow in the ischæmic inner layers was preserved. In this way, the ischæmic-non-ischæmic blood flow ratio decreased and myocardial oxygen deficiency was reduced.

The effects of dexmedetomidine on regional blood flow in ischæmic myocardium are in accordance with studies on the effects of aspecific  $\alpha$  block or stimulation during ischaemia<sup>3</sup>. Preservation of blood flow in ischæmic myocardium by  $\alpha_2$  agonists is probably caused by more powerful local metabolic stimuli during ischaemia, which overrule adrenergic vasoconstriction. As the degree of ischaemia is most severe in the inner layers during hypoperfusion, adrenergic vasoconstriction in this region is inhibited to a greater extent than in the outer layer.

Distal to a flow-limiting stenosis, such specific epicardial vasoconstrictive effect may lead to improvement in endocardial perfusion, the "reverse steal" effect<sup>3</sup>. The decrease in heart rate after dexmedetomidine could be an additional explanation for this beneficial effect on blood flow, because slowing of the heart rate favours endocardial relative to epicardial perfusion. The different findings of Heusch and Deussen<sup>2</sup> who found that  $\alpha_2$  adrenergic activation can worsen myocardial ischaemia, may be explained by differences in preparation, degree of ischaemia, anaesthesia, and intensity and mode of  $\alpha$  adrenergic stimulation.

Our preparation was expected to be highly sensitive to the direct, peripheral vasoconstrictor effects of dexmedetomidine<sup>4</sup>. Compared with humans, we therefore may have overestimated the coronary vasoconstrictive effects and underestimated the central sympatholytic effects of dexmedetomidine. This could also underestimate a possible anti-ischaemic effect of dexmedetomidine, because it was shown that systemic clonidine had anti-ischaemic properties, while intracoronary administration caused vasoconstriction<sup>6</sup>. However, these results should be extrapolated with caution to potential clinical use in humans as the results relate only to halothane-anaesthetized dogs. Halothane not only has marked haemodynamic effects, but could also have influenced the sympathetic responses.

## Acknowledgements

This work was supported in part by Orion Corporation, Farmos, Turku, Finland. We thank Ruud Kruger, Theo Van Der Nagel and Jo Habets for expert technical assistance and Cees Van Leeuwen and Martin Luijck for help in data analysis.

## References

1. Talke P, Li J, Jain U, Leung J, Drasner K, Hollenberg M, Mangano DT, The Study of Perioperative Ischemia Research Group. Effects of perioperative dexmedetomidine infusion in patients undergoing vascular surgery. *Anesthesiology* 1995; **82**: 620–633.
2. Heusch G, Deussen A. The effects of cardiac sympathetic nerve stimulation on perfusion of stenotic coronary arteries in the dog. *Circulation Research* 1983; **53**: 8–15.
3. Nathan HJ, Feigl EO. Adrenergic vasoconstriction lessens transmural steal during coronary hypoperfusion. *American Journal of Physiology* 1986; **19**: H645–H653.
4. Roekaerts PMHJ, Prinzen FW, Willigers HMM, de Lange S. The effects of  $\alpha_2$ -adrenergic stimulation with mivazerol on myocardial blood flow and function during coronary artery stenosis in anesthetized dogs. *Anesthesia and Analgesia* 1996; **82**: 702–711.
5. Rooke GA, Feigl EO. Work as a correlate of canine left ventricular oxygen consumption, and the problem of catecholamine oxygen wasting. *Circulation Research* 1978; **42**: 79–86.
6. Heusch G, Schipke J, Thamer V. Clonidine prevents the sympathetic initiation and aggravation of poststenotic myocardial ischemia. *Journal of Cardiovascular Pharmacology* 1985; **7**: 1176–1182.
